# Supplementary material for: The IN/OUT assay: a new tool to study ciliogenesis
Source: PubMed Central journal article supplement (PMC4972980; doi:10.1186/s13630-016-0044-2), 2016-08-04

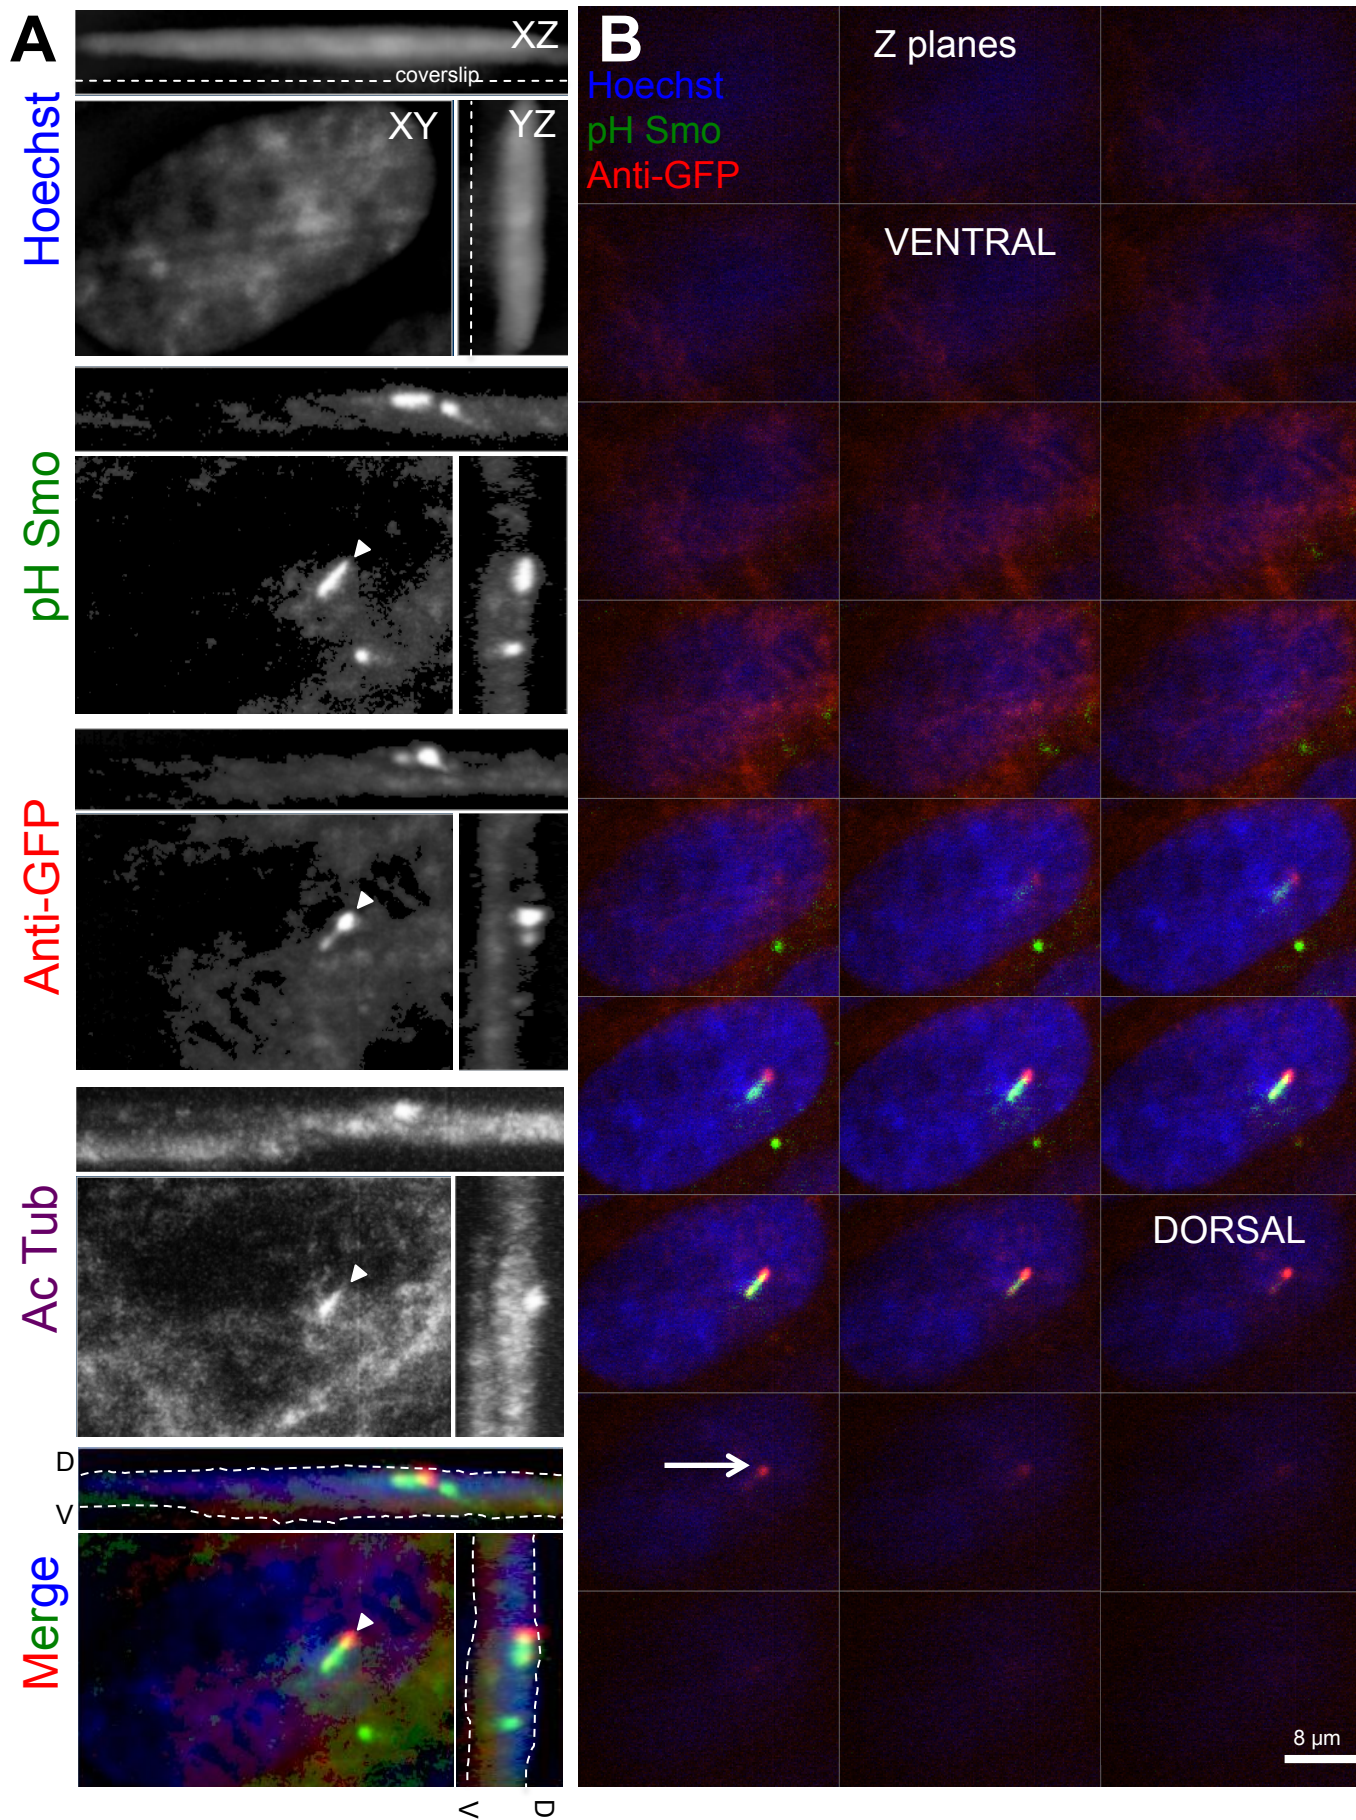

Supplement: 13630_2016_44_MOESM5_ESM.pdf [file 13630_2016_44_MOESM5_ESM.pdf]
